# Supplementary material for: Multi-Analytical Analysis of Decorative Color Plasters from the Thracian Tomb near Alexandrovo, Bulgaria
Source: MDPI journal article supplement (doi:10.3390/min14040374), 2024-04-02
Supplement: s1 [file s1]

# Multi-Analytical Analysis of Decorative Color Plasters from the Thracian Tomb near Alexandrovo, Bulgaria

Georgi Avdeev <sup>1</sup>, Rositsa Kukeva <sup>2</sup>, Denitsa Yancheva <sup>3</sup>, Valentin Mihailov <sup>4</sup>, Vani Tankova <sup>4</sup>, Momtchil Dimitrov <sup>3</sup>, Georgi Nekhrizov <sup>5</sup>, Radostina Stoyanova <sup>2</sup> and Bistra Stamboliyska <sup>3,\*</sup>

<sup>1</sup> Institute of Physical Chemistry, Bulgarian Academy of Sciences, Acad. G. Bonchev Str., Build. 11, 1113 Sofia, Bulgaria; g\_avdeev@ipc.bas.bg

<sup>2</sup> Institute of General and Inorganic Chemistry, Bulgarian Academy of Sciences, Acad. G. Bonchev Str., Build. 11, 1113 Sofia, Bulgaria; rositsakukeva@yahoo.com (R.K.); radstoy@svr.igic.bas.bg (R.S.)

<sup>3</sup> Institute of Organic Chemistry with Centre of Phytochemistry, Bulgarian Academy of Sciences, Acad. G. Bonchev Str., Build. 9, 1113 Sofia, Bulgaria; denitsa.pantaleeva@orgchm.bas.bg (D.Y.); momtchil.dimitrov@orgchm.bas.bg (M.D.)

<sup>4</sup> Institute of Solid State Physics, Bulgarian Academy of Sciences, 72 Tzarigradsko Chaussee, 1784 Sofia, Bulgaria; valentin@issp.bas.bg (V.M.); vtankova@issp.bas.bg (V.T.)

<sup>5</sup> National Archaeological Institute with Museum. Bulgarian Academy of Sciences, 2 Saborna Str., 1000 Sofia, Bulgaria; nehrizov@gmail.com

\* Correspondence: bistra.stamboliyska@orgchm.bas.bg

**Table S1.** The spectral lines used for element detection in the LIBS analysis.

| Elements <sup>a</sup> | Wavelength of spectral lines (nm)                                              |
|-----------------------|--------------------------------------------------------------------------------|
| Ca (I)                | 422.67, 428.30, 428.94, 429.9, 430.77, 431.86, 442.54, 445.48, 558.88, 714.81  |
| Ca (II)               | 315.89, 370.60, 373.69, 393.37, 396.85, 645.69                                 |
| Si (I)                | 288.16, 390.55, 569.04                                                         |
| Mg (I)                | 285.21, 516.73, 517.27, 518.36                                                 |
| Mg (II)               | 592.34                                                                         |
| Fe (I)                | 302.06, 344.06, 358.12, 360.88, 361.87, 374.56, 374.95, 375.82, 438.35, 440.47 |
| Al (I)                | 309.27, 394.40, 396.15                                                         |
| K (I)                 | 766.49, 769.90                                                                 |
| Na (I)                | 589.00, 589.59                                                                 |
| Sr (I)                | 460.73, 483.21                                                                 |
| Mn (I)                | 403.45, 403.31, 403.08                                                         |

<sup>a</sup>The Roman numerals I and II denote spectral lines emitted from neutral atoms and singly ionized atoms, respectively.

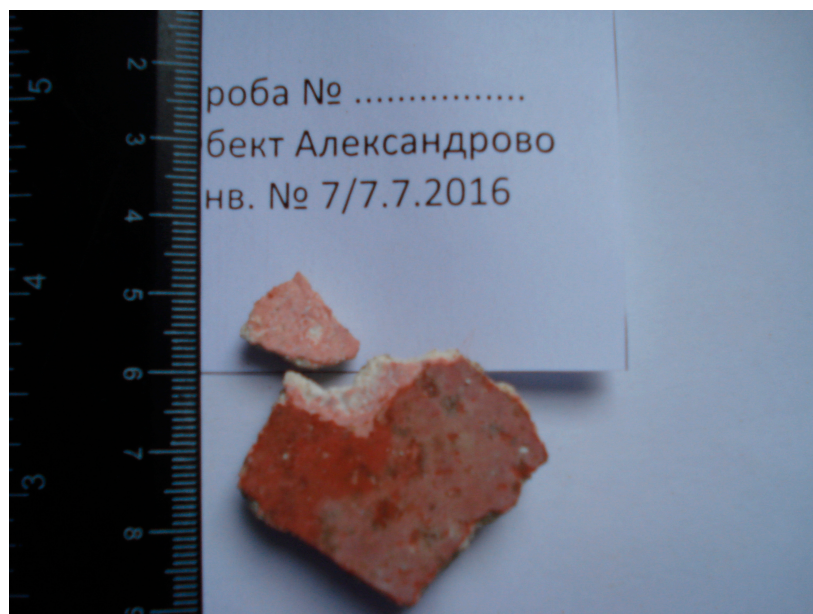

**Figure S1.** Red colored fragment from the dromos.

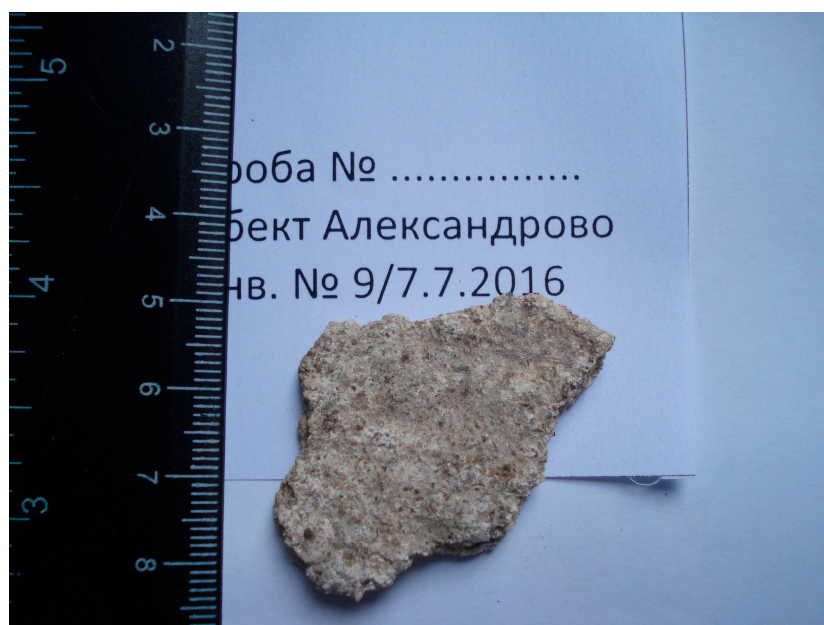

**Figure S2.** White colored fragment from the dromos.

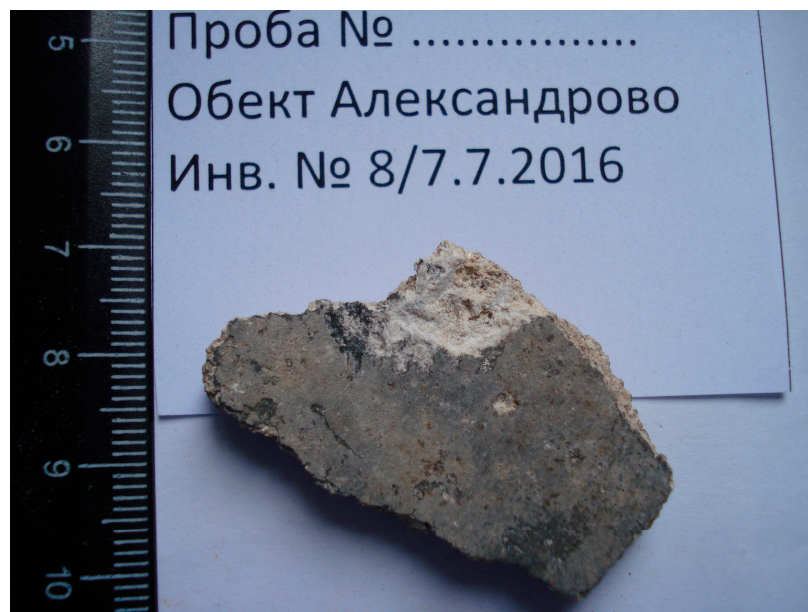

**Figure S3.** Black colored fragment from the dromos.

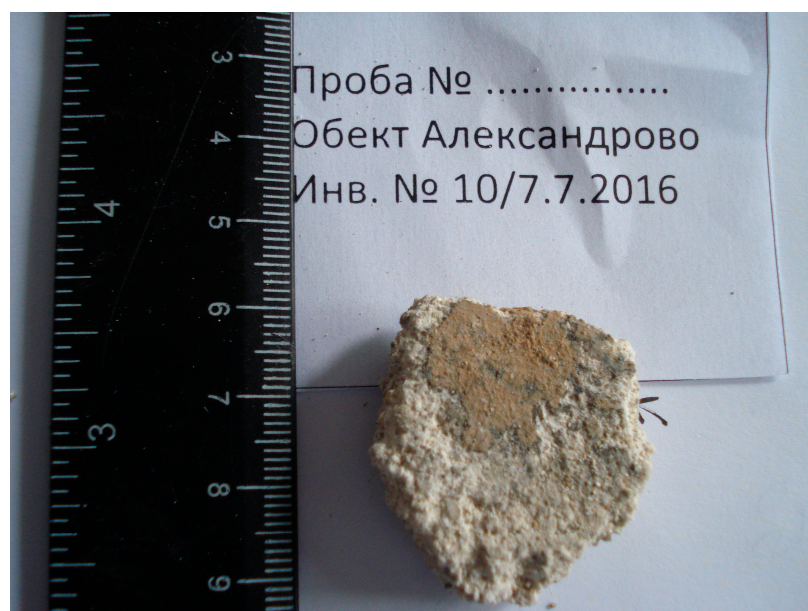

**Figure S4.** Brown colored fragment from the dromos.



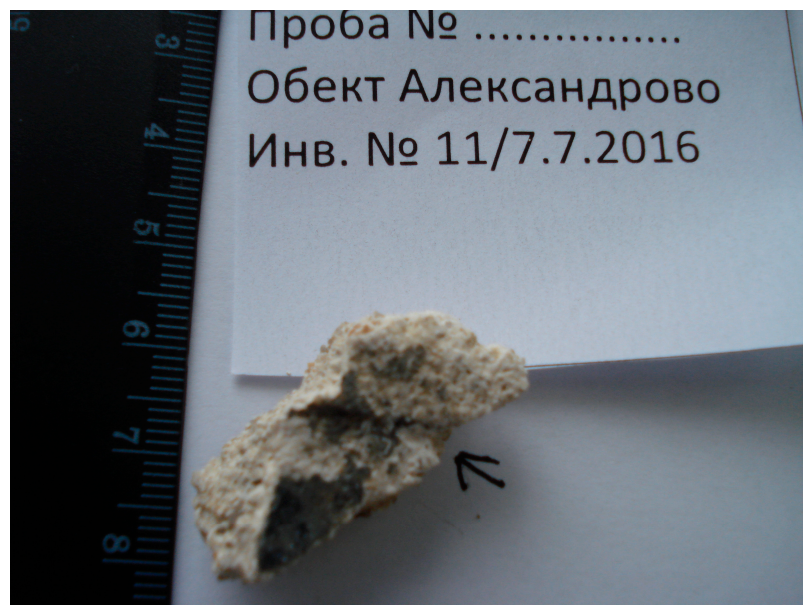

**Figure S5.** Grey colored fragment from the dromos.

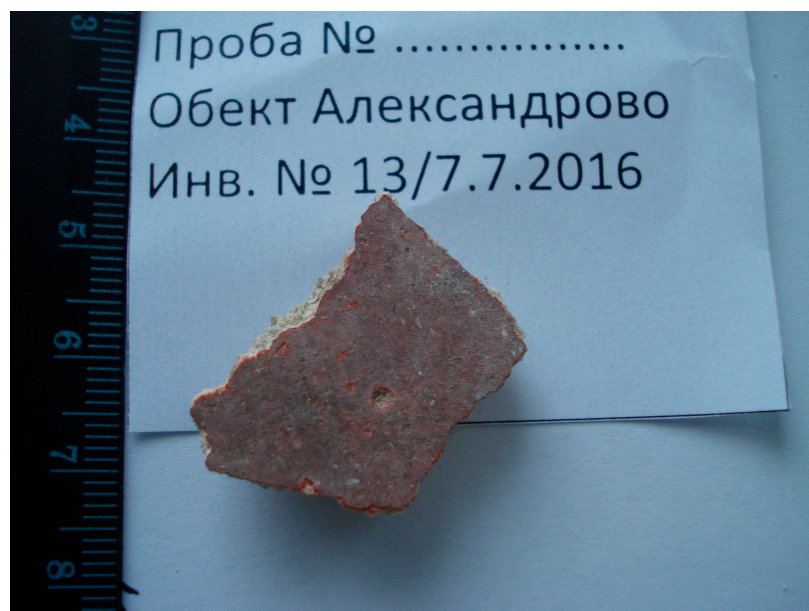

**Figure S6.** Red colored fragment from the chamber.



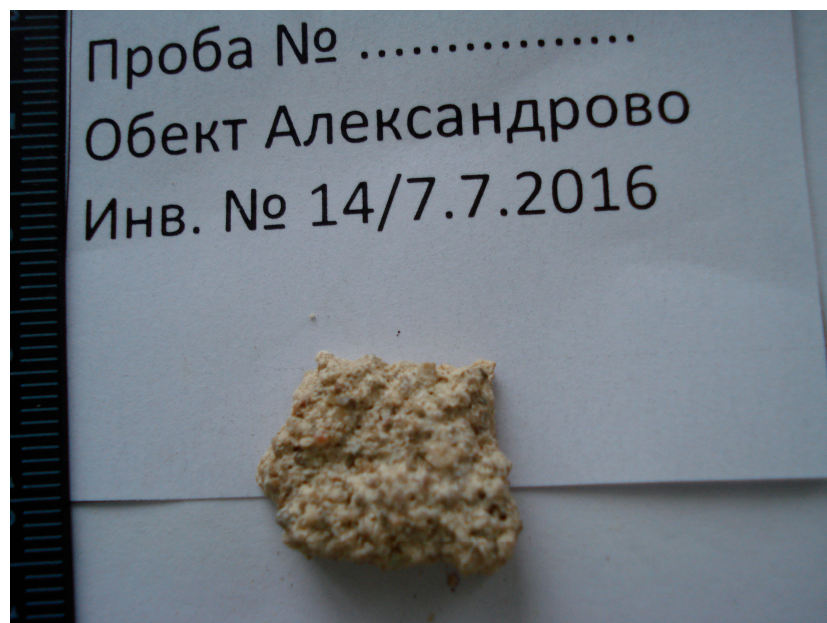

**Figure S7.** White colored fragment from the chamber.

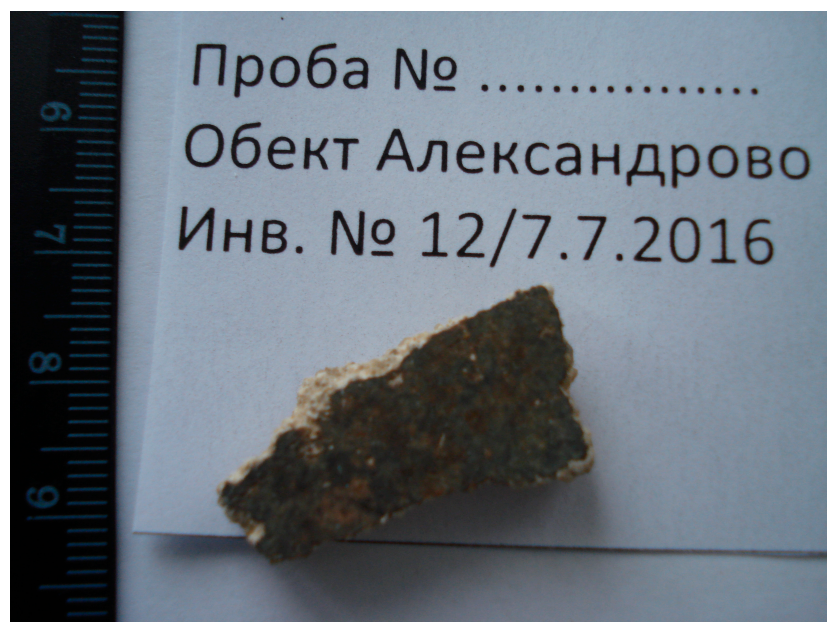

**Figure S8.** Black colored fragment from the chamber.

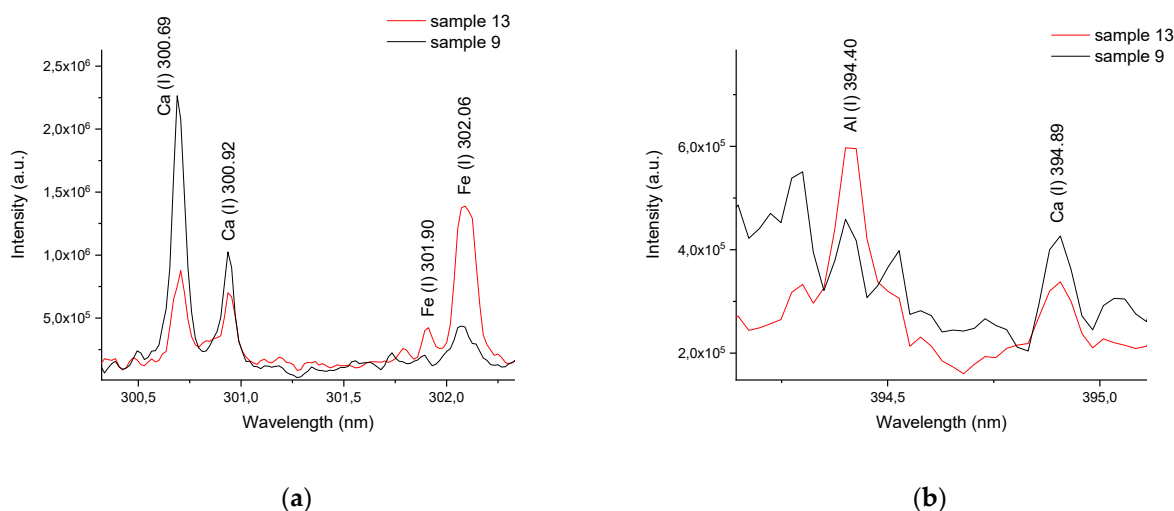

**Figure S9.** Two sections of LIBS spectra in the spectral region **(a)** 300 nm to 303 nm and **(b)** 394 nm to 395 nm obtained from fragments 13 (red, chamber) and 9 (white, dromos) calcium, iron and aluminum spectral lines labeled.

**Table S2.** EPR parameters of reference black pigments and ashed materials.

| Reference Black Pigment Materials | g-factor           | $\Delta H_{pp}$ [mT] |
|-----------------------------------|--------------------|----------------------|
| Furnace Black                     | 2.00261            | 0.35                 |
| Ivory Black (Maimar)              | 2.00294            | 0.30                 |
| Ivory Black (Kremer)              | 2.00289            | 0.25                 |
| Beech (Bister genuine)            | 2.00297            | 0.35                 |
| <b>Literature data</b>            |                    |                      |
| cremated bones                    | 2.0030[2]          | 0.2                  |
| bituminous coals                  | 2.0027 - 2.0038[3] | 0.61 – 0.80          |
| Beech wood                        | 2.0034 - 2.0031[4] | 0.29 – 0.50          |

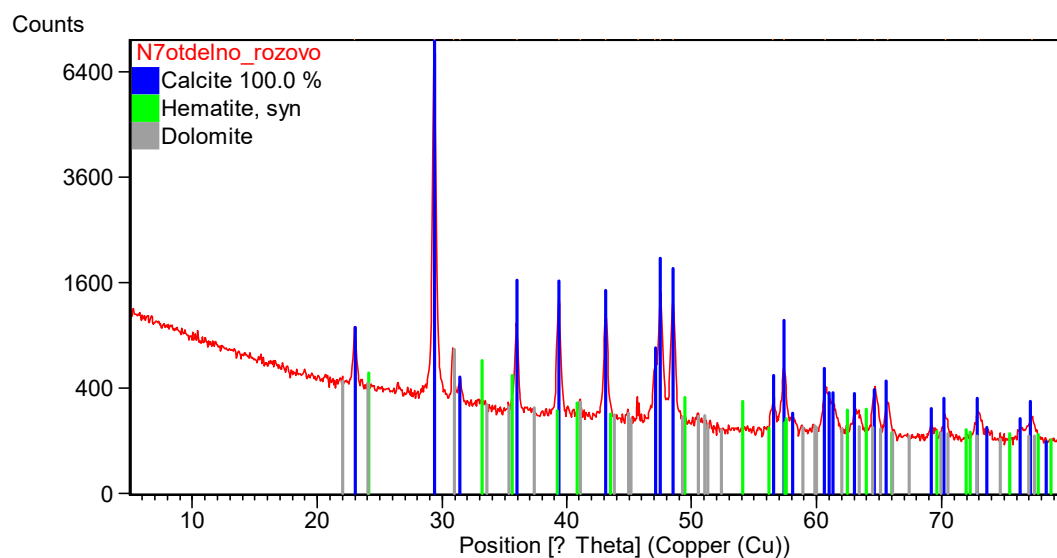

**Figure S10.** Diffraction pattern of red colored fragment from dromos.

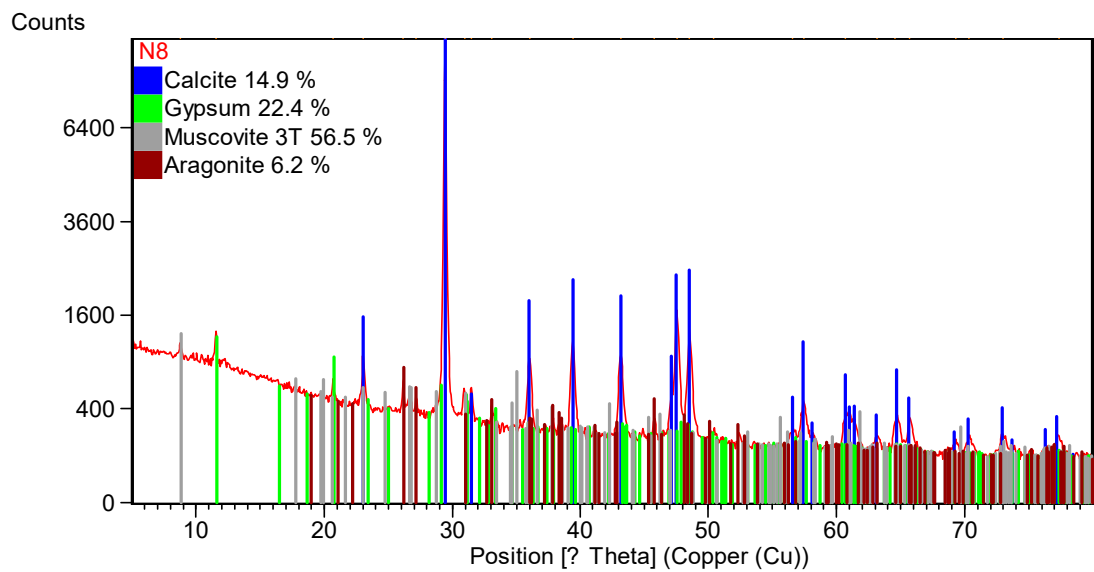

**Figure S11.** Diffraction pattern of black colored fragment from dromos.

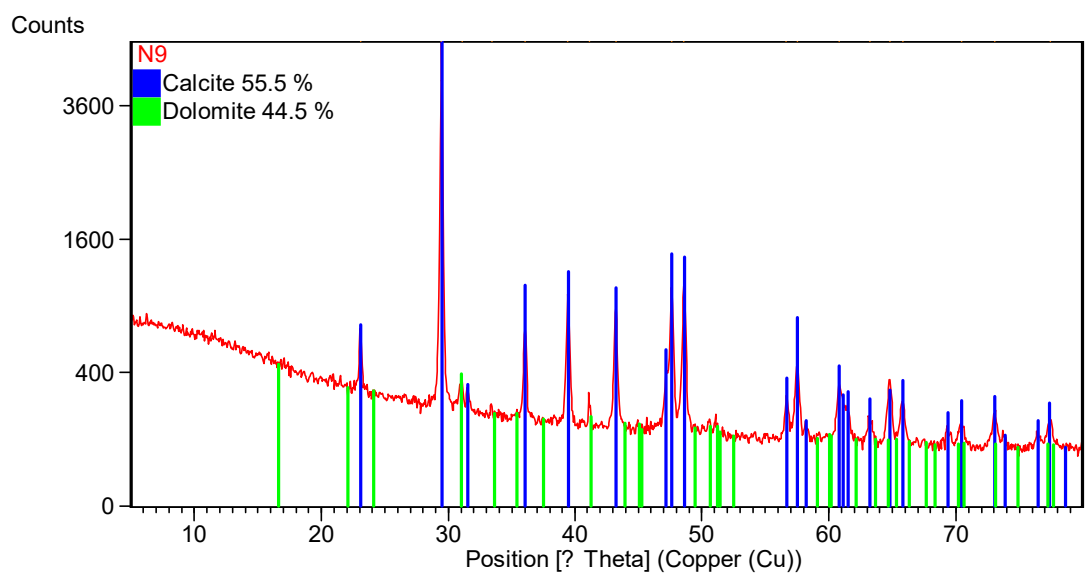

**Figure S12.** Diffraction pattern of white colored fragment from dromos.



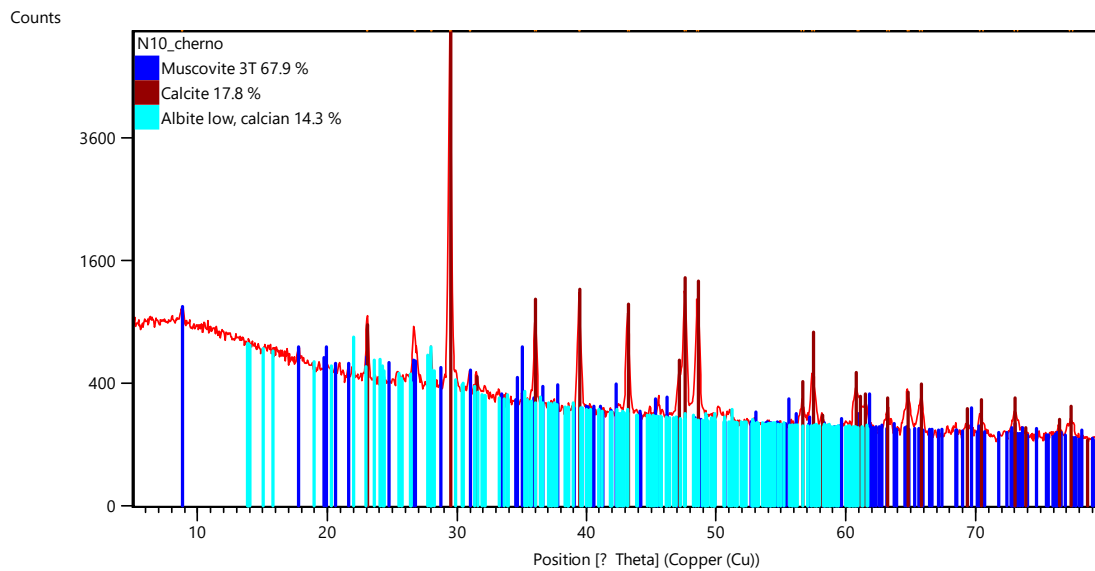

**Figure S13.** Diffraction pattern of brown colored fragment from dromos.

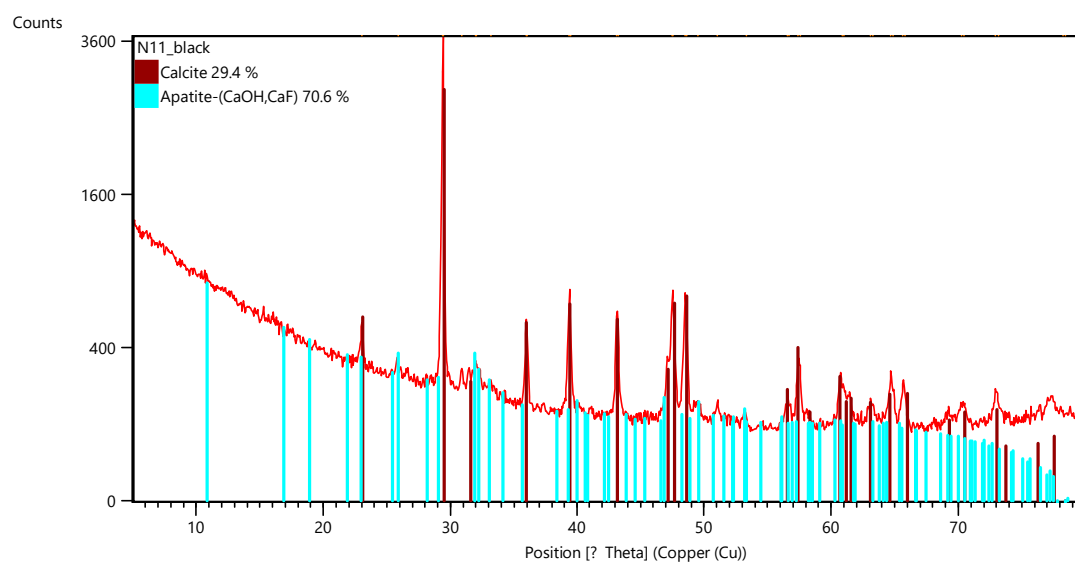

**Figure S14.** Diffraction pattern of grey colored fragment from dromos.

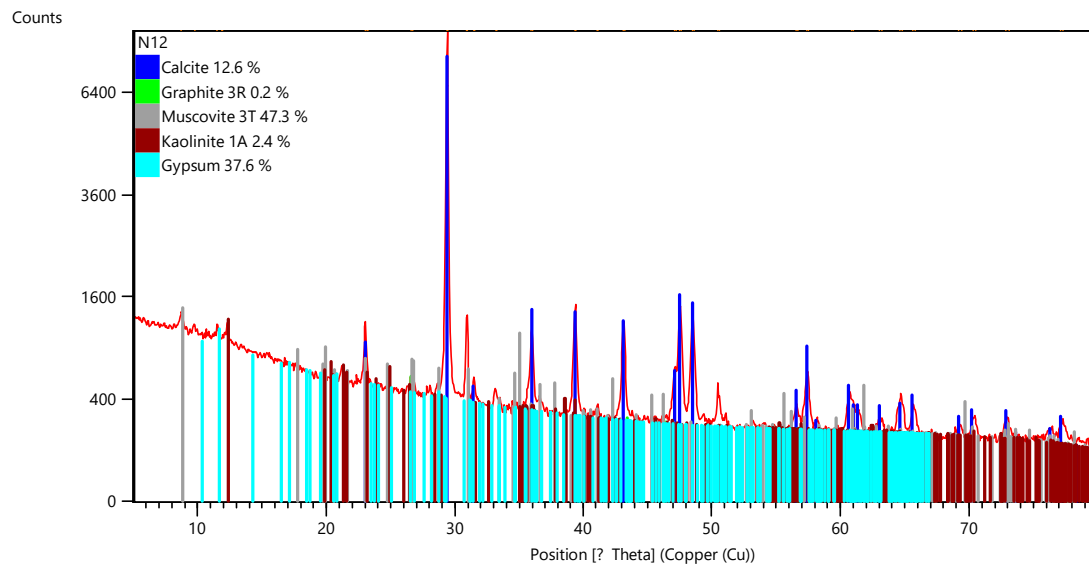

**Figure S15.** Diffraction pattern of black colored fragment from chamber.

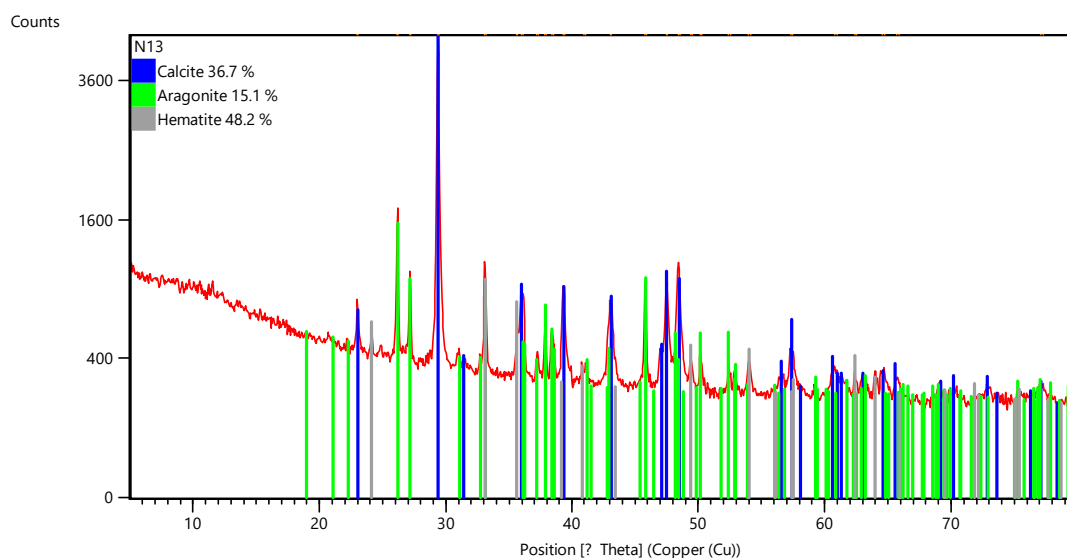

**Figure S16.** Diffraction pattern of red colored fragment from chamber.

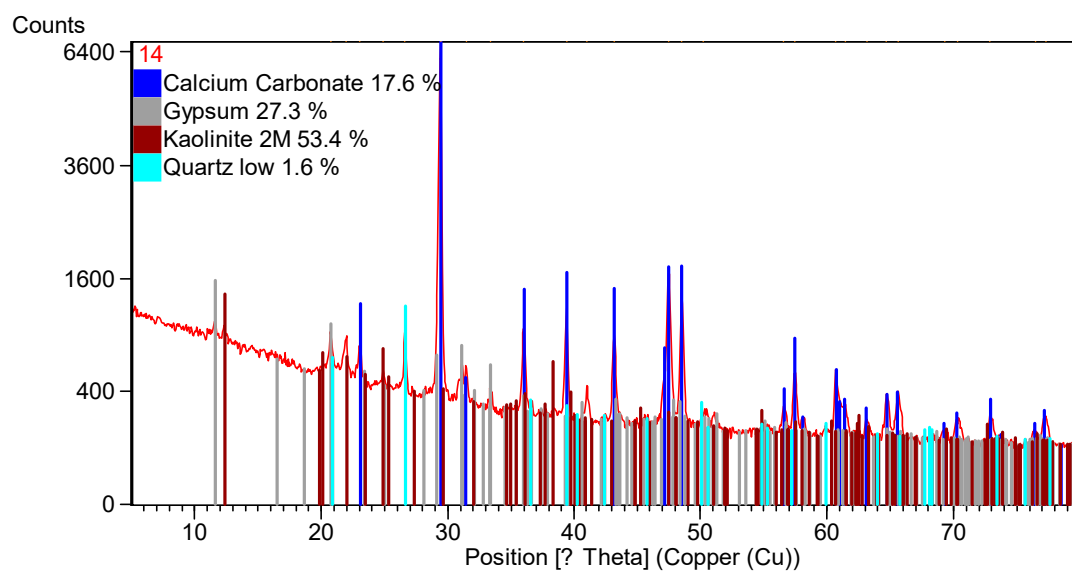

**Figure S17.** Diffraction pattern of black colored fragment from chamber.



**Table S3.** Identified components and IR characteristic bands of the studied samples, measured by ATR-FTIR technique.

| Sample         | Identified Components | IR Characteristic (cm <sup>-1</sup> )  |
|----------------|-----------------------|----------------------------------------|
| White, dromos  | Calcite               | 2521, 1432, 875, 713                   |
| White, chamber | Calcite               | 2521, 1432, 875, 713                   |
|                | Kaolinite             | 3694, 3625, 1109, 1034, 1008, 914      |
| Black, dromos  | Calcite               | 1400, 871, 712                         |
| Black, chamber | Calcite               | 1408, 871, 712                         |
|                | Kaolinite             | 3697, 3621, 1033, 1012, 920, 796, 777  |
| Red, dromos    | Calcite               | 2516, 1407, 872, 847, 712              |
|                | Red ochre             | 3693, 3620, 1099, 1035, 1012, 915, 796 |
| Red, chamber   | Calcite               | 2514, 1406, 871, 712                   |
|                | Red ochre             | 3696, 3620, 1083, 1035, 915, 797       |
| Grey, dromos   | Calcite               | 2512, 1405, 875, 847, 712              |
|                | Hydroxyapatite        | 1029                                   |
| Brown, dromos  | Calcite               | 2512, 1412, 872, 848, 712              |
|                | Aluminosilicate       | 3697, 3624, 1088, 1029, 1008           |

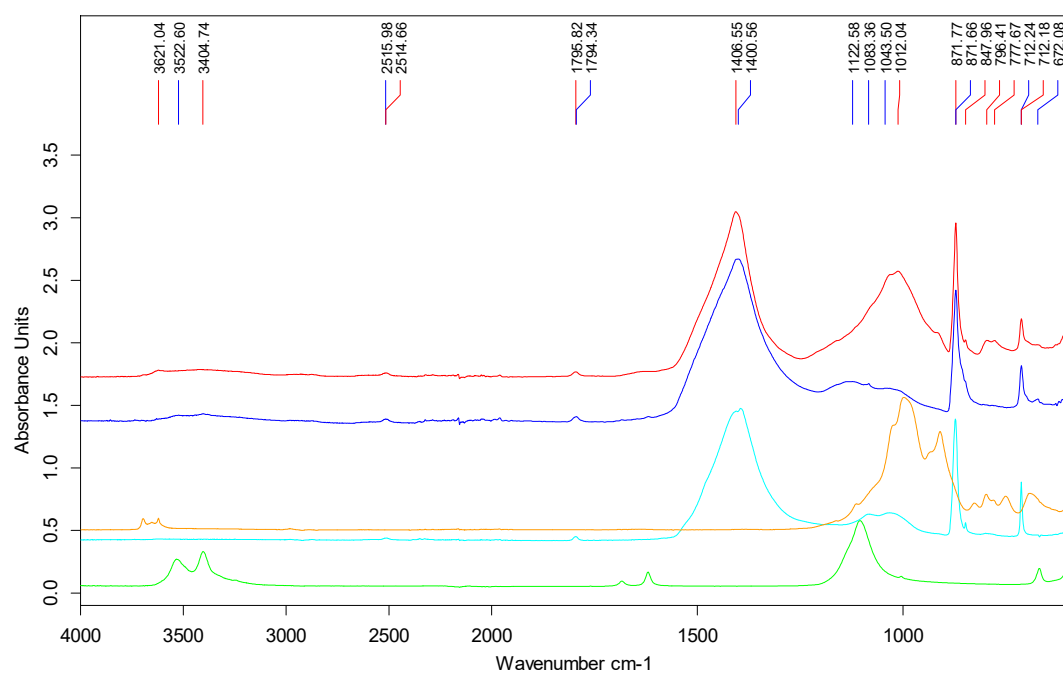

**Figure S18.** ATR-FTIR spectra of the black colored surface layers from dromos (in blue) and chamber (in red); and reference materials calcite (in light blue), gypsum (in green) and kaolinite (in orange).

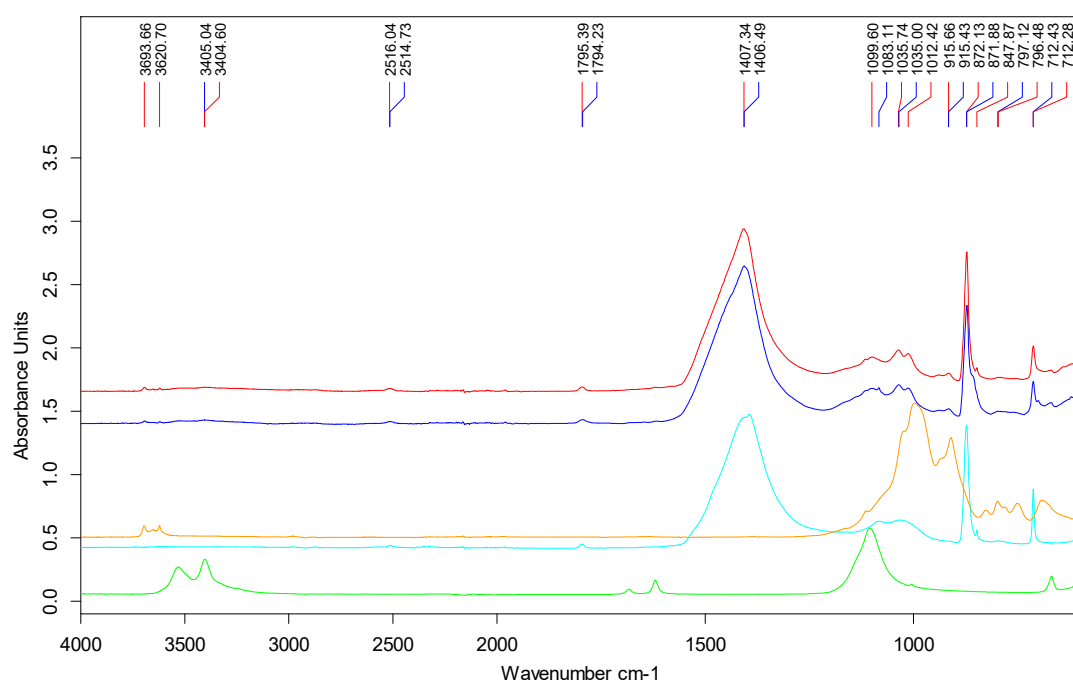

**Figure S19.** ATR-FTIR spectra of the red colored surface layers from dromos (in red) and chamber (in blue); and reference calcite (in light blue), gypsum (in green) and kaolinite (in orange).

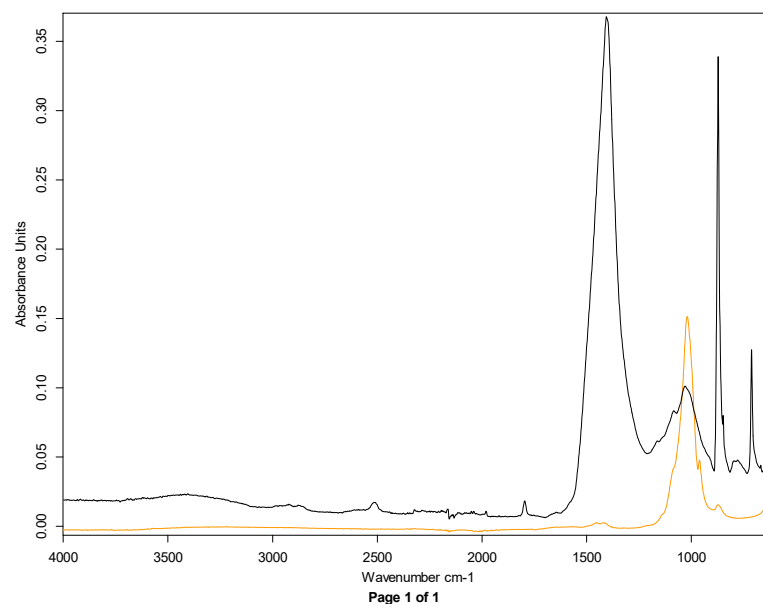

**Figure S20.** ATR-FTIR spectra of the dark grey colored surface layer from dromos (in black) and reference material hydroxyapatite (Ruff R050512, in orange).
